# Supplementary material
Source: PubMed Central journal article supplement (PMC3142862)
Supplement: NIHMS296540-supplement-1.pdf [file NIHMS296540-supplement-1.pdf]

## **Supplemental Figures:**

**Figure S1: Sequence Annotation.** **A)** 1439 sequences were downloaded from Genbank in November 2007. 898 were eliminated because they did not match our inclusion criteria. Of the remaining 541, 281 were quasispecies clones from 18 patients. Each set of clones was reduced to a consensus sequence. The 18 consensus sequences and remaining 260 sequences were distributed to three groups based on the liver status of the patient (HCC, Cirrhosis, Acute and Chronic HCV infection without cirrhosis or HCC). **B)** 1824 sequences were downloaded from Genbank in November 2007. 1132 were eliminated because they did not match our inclusion criteria. Of the remaining 692, 71 were quasispecies clones from 7 patients. Each set of clones was reduced to a consensus sequence. The 7 consensus sequences and remaining 621 sequences were distributed to three groups based on the liver status of the patient (HCC, Cirrhosis, Acute and Chronic HCV infection without cirrhosis or HCC).

**A**

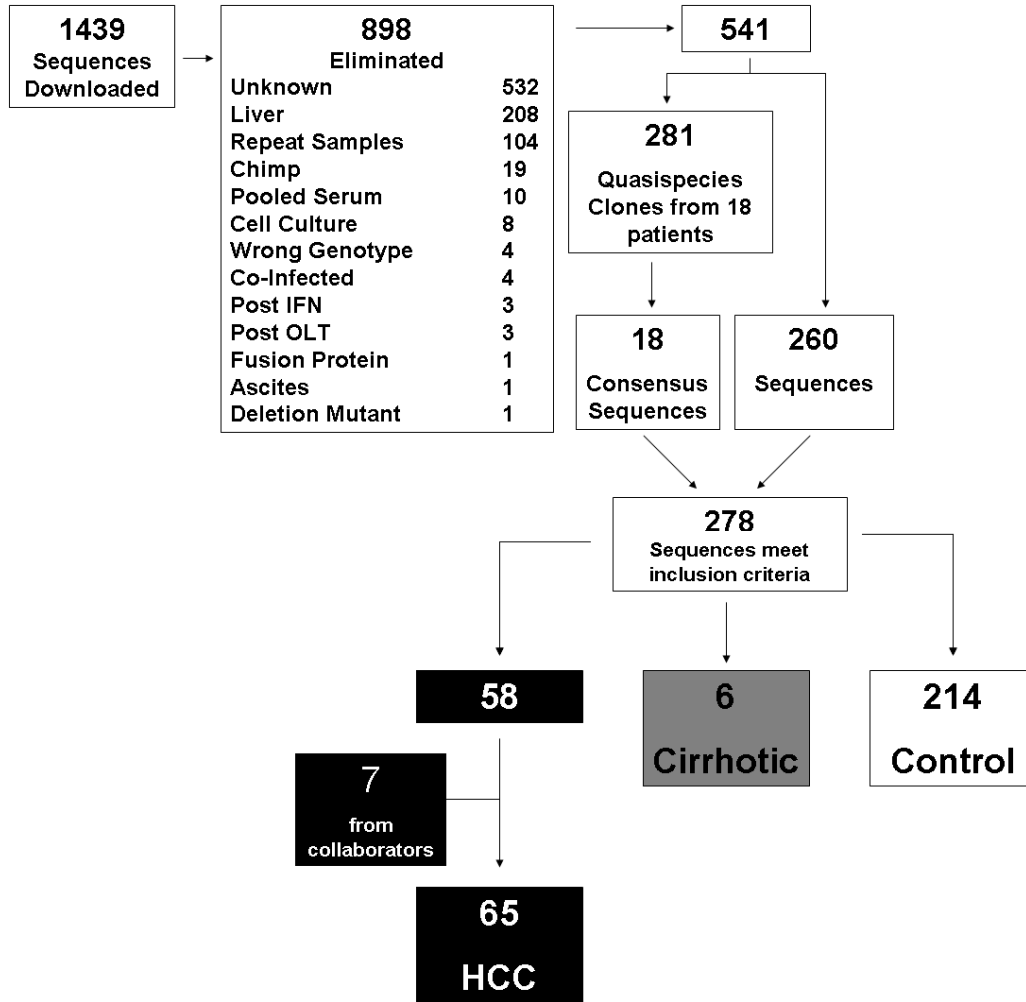

**B**

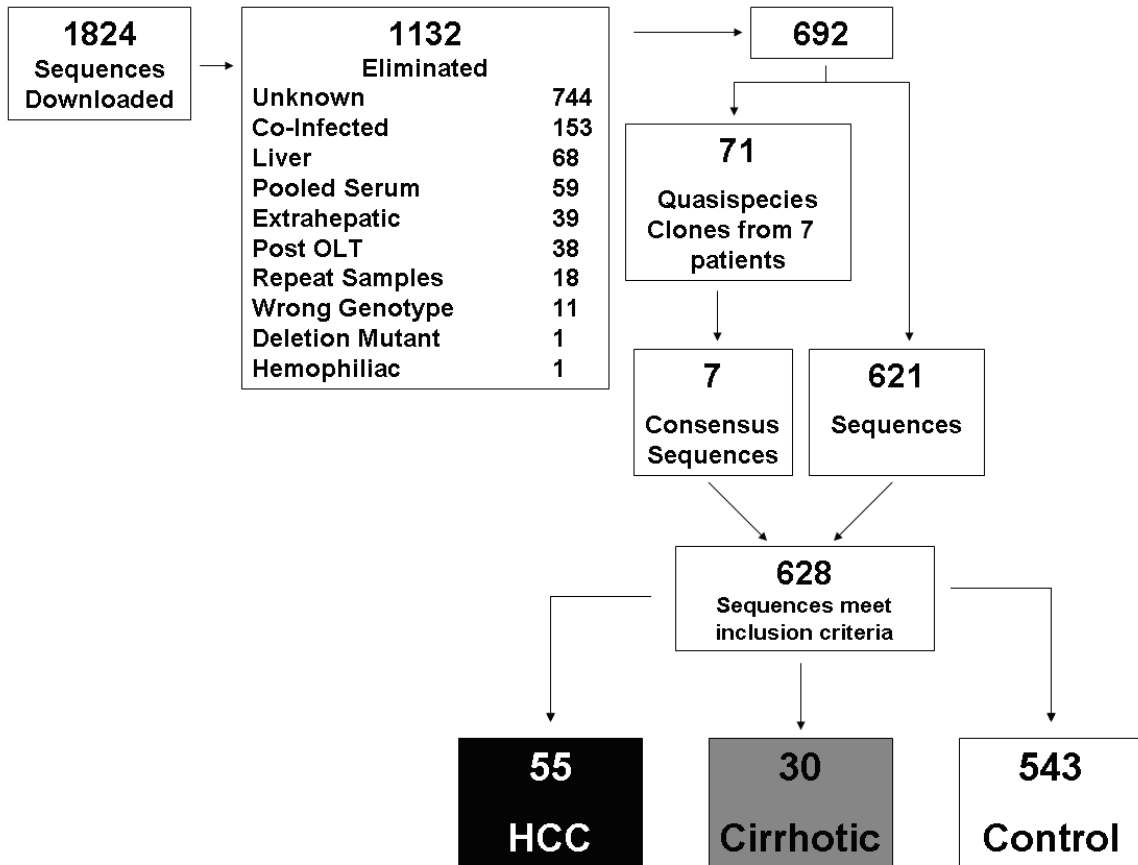

**Supplemental Tables:**

Table S1A: Full-length core gene sequences from Genbank

| Accession Number     | Reference     | Source and/or origin | Group   |
|----------------------|---------------|----------------------|---------|
| AB008441-3           | <sup>1</sup>  | Cell Culture         | OUT     |
| AB008445-7           | <sup>1</sup>  | Cell Culture         | OUT     |
| AB016785             | <sup>2</sup>  | Patient Serum        | CONTROL |
| AB037249             | <sup>3</sup>  | Patient Serum        | CONTROL |
| AB049087-101         | <sup>4</sup>  | Patient Serum        | HCC     |
| AB061927-2026        | <sup>5</sup>  | Liver                | OUT     |
| AB062173-272         | <sup>5</sup>  | Liver                | OUT     |
| AB063485             | <sup>5</sup>  | Patient Serum        | CONTROL |
| AB063486             | <sup>5</sup>  | Repeated Sample      | OUT     |
| AB077701-21          | <sup>6</sup>  | Patient Serum        | CONTROL |
| AB077722-47          | <sup>6</sup>  | Patient Serum        | HCC     |
| AB080299             | <sup>7</sup>  | Cell culture         | OUT     |
| AB086043             | <sup>6</sup>  | Patient Serum        | HCC     |
| AB086044-51          | <sup>6</sup>  | Patient Serum        | CONTROL |
| AB086052-54          | <sup>6</sup>  | Patient Serum        | HCC     |
| AB119282             | <sup>8</sup>  | Core-Neo Fusion      | OUT     |
| AB154177-206 (odds)  | <sup>9</sup>  | Patient serum        | CONTROL |
| AB154177-206 (evens) | <sup>9</sup>  | Repeated samples     | OUT     |
| AB19133              | <sup>10</sup> | Patient serum        | CONTROL |

|                     |          |                          |         |
|---------------------|----------|--------------------------|---------|
| AF054247-59         | 11,12    | Chimp                    | OUT     |
| AF072824            | No Paper | Insufficient Information | OUT     |
| AF139594            | 13       | Pooled sample            | OUT     |
| AF165045-64 (odds)  | 14       | Patient Sera             | CONTROL |
| AF165045-64 (evens) | 14       | Repeated Samples         | OUT     |
| AF176573            | 15-17    | Patient Serum            | CONTROL |
| AF207752-61         | 18       | Patient Serum            | CONTROL |
| AF207762-74         | 18       | Patient Serum            | HCC     |
| AF208024            | 18       | Patient Serum            | CONTROL |
| AF313196            | 9        | Patient Serum            | CONTROL |
| AF333324            | 19       | Chimp                    | OUT     |
| AF356827            | 20       | Patient Serum            | CONTROL |
| AF483269            | 21       | Patient Serum            | CONTROL |
| AF531454            | 22       | Patient Serum            | CIRR    |
| AF531455            | 22       | Post Transplant          | OUT     |
| AJ00009             | 23       | Patient Serum            | CONTROL |
| AJ132996-97         | 24       | Pooled Sample            | OUT     |
| AJ238799            | 25       | Liver                    | OUT     |
| AJ238800            | 25,26    | Post Transplant          | OUT     |
| AM262455-66         | No Paper | Patient Serum            | CONTROL |
| AM262467-79         | No Paper | Patient Serum            | CONTROL |
| AM262480-93         | No Paper | Patient Serum            | CONTROL |

|                |          |                          |         |
|----------------|----------|--------------------------|---------|
| AM262494-511   | No Paper | Patient Serum            | CONTROL |
| AM285684-6184  | No Paper | Insufficient Information | OUT     |
| AM397933-949   | No Paper | Insufficient Information | OUT     |
| AY045702       | 27       | Patient Serum            | CONTROL |
| AY070174       | 28       | Patient Serum            | CONTROL |
| AY070214       | 28       | Recombinant              | OUT     |
| AY070215       | 28       | Recombinant              | OUT     |
| AY308072       | 29-31    | Chimp                    | OUT     |
| AY365213       | 32       | Patient Serum            | CONTROL |
| AY460204       | No Paper | Insufficient Information | OUT     |
| AY521935-45    | 33       | Patient Serum            | CONTROL |
| AY521946-56    | 33       | Repeated Sample          | OUT     |
| AY521981       | 33       | Patient Serum            | CONTROL |
| AY522009       | 33       | Repeated Sample          | OUT     |
| AY522011-22    | 33       | Patient Serum            | CIRR    |
| AY522023-33    | 33       | Repeated Sample          | OUT     |
| AY522079-90    | 33       | Patient Serum            | CIRR    |
| AY522097       | 33       | Patient Serum            | CIRR    |
| AY522159-70    | 33       | Patient Serum            | CIRR    |
| AY522235-40    | 33       | Patient Serum            | CONTROL |
| AY522241-51    | 33       | Repeated Samples         | OUT     |
| AY522275,77,79 | 33       | Patient Serum            | CIRR    |

|              |          |                          |         |
|--------------|----------|--------------------------|---------|
| AY522284-93  | 33       | Repeated Samples         | OUT     |
| AY587016     | No Paper | Cell culture             | OUT     |
| AY587287-497 | No Paper | Patient Serum            | CONTROL |
| AY587844     | 28       | Patient Serum            | CONTROL |
| AY587845     | 28       | Recombinant              | OUT     |
| AY652608     | No Paper | Insufficient Information | OUT     |
| AY940619-22  | No Paper | Insufficient Information | OUT     |
| D00574       | 34       | Patient Plasma           | CONTROL |
| D00832       | 35       | Chimp                    | OUT     |
| D10074       | 35       | Patient Plasma           | CONTROL |
| D10687       | 36       | Patient Serum            | CONTROL |
| D10688       | 36       | Chimp                    | OUT     |
| D10750       | 15       | Chimp                    | OUT     |
| D10934       | 37       | Insufficient Information | OUT     |
| D11168       | 38       | Patient Serum            | CONTROL |
| D11355       | 38       | Repeated Sample          | OUT     |
| D13406       | 39,40    | Repeated Sample          | OUT     |
| D13558       | 15       | Chimp                    | OUT     |
| D14484       | No Paper | Insufficient Information | OUT     |
| D30613       | 41       | Patient Serum            | CONTROL |
| D45172       | 42       | Repeated Sample          | OUT     |
| D50480-82    | 43       | Patient Serum            | CONTROL |

|                     |          |                          |         |
|---------------------|----------|--------------------------|---------|
| D50483-85           | 43       | Post IFN                 | OUT     |
| D63857              | No Paper | Insufficient Information | OUT     |
| D83645              | 44       | Patient Serum            | CONTROL |
| D85516              | 45       | Patient Serum            | CONTROL |
| D89815              | 46       | Patient Serum            | CONTROL |
| D89872              | No Paper | Insufficient Information | OUT     |
| D90208              | 47       | Pooled Sample            | OUT     |
| DQ061296            | 48       | Patient Serum            | CONTROL |
| DQ061297            | 48       | Repeated Sample          | OUT     |
| DQ061298-99         | 48       | Repeated Sample          | OUT     |
| DQ061331-74 (odds)  | 49       | Patient Serum            | CONTROL |
| DQ061331-74 (evens) | 49       | Repeated Samples         | OUT     |
| DQ061375-78         | 49       | Pooled Sample            | OUT     |
| DQ228488-93         | No Paper | Insufficient Information | OUT     |
| DQ364460            | 50       | Recombinant              | OUT     |
| DQ859967            | No Paper | Patient Serum            | CONTROL |
| EF407458-504        | 51       | Patient Serum            | CONTROL |
| EF420126            | 52       | Patient Serum            | CONTROL |
| EF420127            | 52       | Deletion Mutant          | OUT     |
| EF560531            | 53       | Patient Serum            | CONTROL |
| EF560532-4          | 53       | Repeated Sample          | OUT     |
| EF560551            | 53       | Patient Serum            | CONTROL |



|            |          |                          |         |
|------------|----------|--------------------------|---------|
| EF560552-4 | 53       | Repeated Sample          | OUT     |
| L02836     | No Paper | Insufficient Information | OUT     |
| L12354     | 54       | Patient Serum            | CONTROL |
| L20498     | 55       | Pooled Sample            | OUT     |
| L38318     | 56       | Patient Serum            | CONTROL |
| M58335     | 57       | Pooled Sample            | OUT     |
| M74806     | 58       | Patient Serum            | CONTROL |
| M74807     | 58       | Patient Serum            | CONTROL |
| M74809     | 58       | Patient Serum            | CONTROL |
| M74810     | 58       | Patient Serum            | CONTROL |
| M74813     | 58       | Patient Serum            | CONTROL |
| M74814     | 58       | Patient Serum            | CONTROL |
| M74815     | 58       | Patient Serum            | CONTROL |
| M74888     | 59       | Patient Serum            | CONTROL |
| M84754     | 60       | Liver                    | OUT     |
| M86779     | 61       | Post-OLT                 | OUT     |
| M96362     | No Paper | Insufficient Information | OUT     |
| S62220     | 13       | Patient Serum            | CONTROL |
| S72727,8   | 62       | Patient Serum            | CONTROL |
| S76540     | 63       | Patient Serum            | CONTROL |
| S78528     | 64       | Patient Serum            | CONTROL |
| U01214     | No Paper | Insufficient Information | OUT     |

|            |               |                          |         |
|------------|---------------|--------------------------|---------|
| U10189-234 | <sup>65</sup> | Patient Serum            | CONTROL |
| U16362     | No Paper      | Insufficient Information | OUT     |
| U45461-3   | No Paper      | Insufficient Information | OUT     |
| U45476     | No Paper,     | Insufficient Information | OUT     |
| U55282     | <sup>66</sup> | Patient Serum***         | OUT     |
| U55284     | <sup>66</sup> | Patient Serum***         | OUT     |
| U63376-9   | <sup>67</sup> | HBV Co-infected          | OUT     |
| U89019     | <sup>68</sup> | Ascites fluid            | OUT     |
| X61591-6   | <sup>69</sup> | Liver                    | OUT     |
| X65924     | No Paper      | Insufficient information | OUT     |

\*\*\* These sequences were not included because information about those

sequences was unavailable at the time experiments were conducted.

Table S1B: Core gene sequence fragments in Genbank

| Accession Number | Reference                                   | Source/Origin            | Group   |
|------------------|---------------------------------------------|--------------------------|---------|
| AB014487         | <sup>70</sup>                               | Insufficient Information | OUT     |
| AB030159-73      | <sup>71</sup>                               | Insufficient Information | OUT     |
| AB030959-1001    | No Paper                                    | Insufficient Information | OUT     |
| AB039866-77      | <sup>72</sup>                               | Insufficient Information | OUT     |
| AB162859-61      | HCV site                                    | Insufficient Information | OUT     |
| AB245555-873     | <sup>73</sup>                               | Insufficient Information | OUT     |
| AB269350-2       | <sup>74</sup>                               | Patient Serum            | CONTROL |
| AB291002-28      | <sup>74</sup>                               | Patient Serum            | CONTROL |
| AB301744-64      | Abe, Kenji<br>personal<br>communic<br>ation | Advanced Liver Disease   | OUT     |
| AB306333-404     | Abe, Kenji<br>personal<br>communic<br>ation | Advanced Liver Disease   | OUT     |
| AF086640         | No Paper,                                   | Insufficient Information | OUT     |
| AF118580-83      | <sup>75</sup>                               | Risk of Co-infection     | OUT     |
| AF118622-24      | <sup>75</sup>                               | Risk of Co-infection     | OUT     |
| AF118630-32      | <sup>75</sup>                               | Risk of Co-infection     | OUT     |
| AF134740-49      | <sup>76</sup>                               | Patient Serum            | CONTROL |

|               |          |                          |         |
|---------------|----------|--------------------------|---------|
| AF205595      | No Paper | Insufficient Information | OUT     |
| AF210895-901  | No Paper | Insufficient Information | OUT     |
| AF213648-54   | 77       | Insufficient Information | OUT     |
| AF213894-95   | 78       | Insufficient Information | OUT     |
| AF233703-14   | 79       | Insufficient Information | OUT     |
| AF271819      | 80       | Risk of co-infection     | OUT     |
| AF350914-17   | 81       | Patient Serum            | CONTROL |
| AF379040-67   | 82       | Patient Serum            | CIRR    |
| AF379068-118  | 82       | Patient Serum            | HCC     |
| AF482729      | 83       | Blood Donors             | CONTROL |
| AF484974      | 83       | Blood Donors             | CONTROL |
| AF484975      | 83       | Blood Donors             | CONTROL |
| AF506614-20   | 84       | Risk of Co-infection     | OUT     |
| AF525887-94   | 83       | Blood Donors             | CONTROL |
| AJ507016-7035 | No Paper | Insufficient Information | OUT     |
| AJ582128-30   | 85       | Insufficient Information | OUT     |
| AJ582131      | 85       | Insufficient Information | OUT     |
| AJ781119      | 86       | Insufficient Information | OUT     |
| AJ781122-23   | 86       | Insufficient Information | OUT     |
| AJ849973-74   | 87       | Patient Serum            | Control |
| AM114084-98   | No Paper | Insufficient Information | OUT     |
| AM422808-29   | No Paper | Insufficient Information | OUT     |
| AM494544-83   | No Paper | Insufficient Information | OUT     |

|              |          |                          |         |
|--------------|----------|--------------------------|---------|
| AM500641-43  | No Paper | Insufficient Information | OUT     |
| AY070167-174 | 28       | Wrong genotype           | OUT     |
| AY070195-210 | 28       | Patient Serum            | CONTROL |
| AY079244-86  | 88       | Risk of Co-infection     | OUT     |
| AY089747-64  | 83       | Patient Plasma           | CONTROL |
| AY190328-74  | 76       | Patient Serum            | CONTROL |
| AY256786     | 89       | Risk of Co-infection     | OUT     |
| AY344020-24  | 90       | Insufficient Information | OUT     |
| AY446021-23  | 91       | HIV Co-infection         | OUT     |
| AY506668-95  | 92       | Patient Serum            | CONTROL |
| AY548590     | 93       | Patient Serum            | CONTROL |
| AY548630     | 93       | Patient Serum            | HCC     |
| AY548656     | 93       | Patient Serum            | HCC     |
| AY576547-51  | 94       | Patient Serum            | CONTROL |
| AY576552-64  | 94       | Advanced Liver Disease   | OUT     |
| AY576565-77  | 94       | Patient Serum            | CIRR    |
| AY576578-85  | 94       | Advanced Liver Disease   | OUT     |
| AY576586-87  | 94       | Patient Serum            | CONTROL |
| AY576588-603 | 94       | Advanced Liver Disease   | OUT     |
| AY587465-81  | No Paper | Patient Serum            | CONTROL |
| AY600628-44  | 95       | Liver                    | OUT     |
| AY600645-54  | 95       | Patient Serum            | CONTROL |
| AY600655-66  | 95       | Extrahepatic             | OUT     |

|               |                                                    |                          |         |
|---------------|----------------------------------------------------|--------------------------|---------|
| AY600667-77   | <sup>95</sup>                                      | Liver                    | OUT     |
| AY600678-91   | <sup>95</sup>                                      | Patient Serum            | CONTROL |
| AY600692-706  | <sup>95</sup>                                      | Extrahepatic             | OUT     |
| AY600707-17   | <sup>95</sup>                                      | Liver                    | OUT     |
| AY600718-27   | <sup>95</sup>                                      | Patient Serum            | CONTROL |
| AY600728-39   | <sup>95</sup>                                      | Extrahepatic             | OUT     |
| AY652609-13   | No Paper                                           | Insufficient Information | OUT     |
| AY739365-84   | <sup>96</sup>                                      | Patient Serum            | CONTROL |
| AY765237-239  | Nelson,<br>Kenrad<br>personal<br>communic<br>ation | Patient Serum            | CONTROL |
| AY766709-8358 | <sup>97</sup>                                      | Risk of Co-infection     | OUT     |
| AY835076-317  | <sup>98</sup>                                      | Patient Serum            | CONTROL |
| AY878435      | <sup>99</sup>                                      | HIV Co-infection         | OUT     |
| AY898811      | <sup>100</sup>                                     | Post OLT                 | OUT     |
| AY898812-32   | <sup>100</sup>                                     | Patient Serum            | CONTROL |
| AY898833-54   | <sup>100</sup>                                     | Post OLT                 | OUT     |
| AY921165-72   | <sup>101</sup>                                     | Patient Serum            | CONTROL |
| AY921608      | <sup>101</sup>                                     | Patient Serum            | CONTROL |
| D00689-91     | <sup>102</sup>                                     | Pooled Serum             | OUT     |
| D11153-56     | <sup>102</sup>                                     | Patient Serum            | CONTROL |

|                 |                |                          |         |
|-----------------|----------------|--------------------------|---------|
| D13729-35       | <sup>103</sup> | Advanced Liver Disease   | OUT     |
| D14116          | <sup>104</sup> | Patient Serum            | CONTROL |
| D14829          | <sup>105</sup> | Patient Serum            | CONTROL |
| D14830-31       | <sup>105</sup> | Repeated Sample          | OUT     |
| D16694-806      | No Paper       | Insufficient Information | OUT     |
| D26394-408      | <sup>106</sup> | Repeated Samples         | OUT     |
| D28918-28933    | <sup>105</sup> | Patient Serum            | CONTROL |
| D30614          | <sup>41</sup>  | Repeated Sample          | OUT     |
| D49455, 62      | <sup>107</sup> | Patient Serum            | CONTROL |
| DQ001223- 70    | No Paper       | Insufficient Information | OUT     |
| DQ065829, 36    | <sup>108</sup> | Patient Serum            | CONTROL |
| DQ155449-98     | <sup>109</sup> | Patient Serum            | CONTROL |
| DQ233304-14     | <sup>110</sup> | Patient Serum            | CONTROL |
| DQ249537-641    | <sup>111</sup> | Pooled Sample            | OUT     |
| DQ374420-21     | <sup>92</sup>  | Patient Serum            | CONTROL |
| DQ417428-33     | <sup>112</sup> | Wrong genotype           | OUT     |
| DQ485285        | <sup>113</sup> | Patient Serum            | CIRR    |
| DQ518404        | No Paper       | Insufficient Information | OUT     |
| DQ529987-530016 | No Paper       | Insufficient Information | OUT     |
| DQ640336-54     | <sup>114</sup> | Patient Serum            | CONTROL |
| DQ641950-77     | <sup>115</sup> | Liver                    | OUT     |
| DQ648495-97     | <sup>116</sup> | Risk of Co-infection     | OUT     |
| DQ776842-809    | <sup>117</sup> | Risk of Co-infection     | OUT     |

|               |                |                          |         |
|---------------|----------------|--------------------------|---------|
| DQ839181- 220 | <sup>118</sup> | Insufficient Information | OUT     |
| DQ859926-61   | No Paper       | Insufficient Information | CONTROL |
| EF115778-97   | <sup>119</sup> | Insufficient Information | OUT     |
| EF175795-98   | <sup>120</sup> | Insufficient Information | OUT     |
| EF185933-90   | No Paper       | Insufficient Information | OUT     |
| EF205221-29   | <sup>79</sup>  | Insufficient Information | OUT     |
| EF394373-425  | No Paper       | Insufficient Information | OUT     |
| EF543226-38   | HCV Site       | Patient Serum            | CONTROL |
| EU155217- 382 | HCV Site       | Patient Plasma           | CONTROL |
| L38343-421    | <sup>56</sup>  | Patient Serum            | CONTROL |
| L39285-311    | <sup>121</sup> | Advanced Liver Disease   | OUT     |
| L44598-99     | <sup>56</sup>  | Patient Serum            | CONTROL |
| L50543-55     | <sup>122</sup> | Blood Donors             | CONTROL |
| M84830-863    | <sup>123</sup> | Patient Serum            | CONTROL |
| M86765        | <sup>61</sup>  | Post OLT                 | OUT     |
| S46012        | <sup>124</sup> | Pooled Sample            | OUT     |
| S50215        | <sup>125</sup> | Post OLT                 | OUT     |
| S63245        | <sup>126</sup> | Insufficient Information | OUT     |
| S64510        | <sup>127</sup> | Patient Serum            | CONTROL |
| S67463        | <sup>128</sup> | Pooled Sample            | OUT     |
| S71864        | <sup>129</sup> | Patient Serum            | HCC     |
| S83169        | <sup>130</sup> | Liver                    | OUT     |
| U05028        | <sup>119</sup> | Insufficient Information | OUT     |



|            |                |                     |         |
|------------|----------------|---------------------|---------|
| U23385-90  | <sup>131</sup> | Patient Serum       | CONTROL |
| U23744     | <sup>131</sup> | Patient Serum       | CONTROL |
| U28029     | <sup>132</sup> | Patient Serum       | CONTROL |
| U31232     | <sup>133</sup> | Hemophiliacs        | OUT     |
| U37592-609 | <sup>134</sup> | Patient Serum       | CONTROL |
| U45464-75  | HCV Site       | Post OLT            | OUT     |
| U89015     | <sup>68</sup>  | Patient Serum       | HCC     |
| U94722     | <sup>135</sup> | Possible transplant | OUT     |
| X76408-13  | <sup>136</sup> | Patient Serum       | CONTROL |
| X78950-51  | <sup>137</sup> | Patient Serum       | CONTROL |
| X91297     | <sup>138</sup> | Patient Serum       | CONTROL |
| X91302     | <sup>138</sup> | Patient Serum       | CIRR    |
| X91304     | <sup>138</sup> | Patient Serum       | CONTROL |
| X91305     | <sup>138</sup> | Patient Serum       | CONTROL |
| Z29445-454 | <sup>139</sup> | Patient Serum       | CONTROL |

Supplemental References:

Reference List

1. Kato, N., Ikeda, M., Sugiyama, K., Mizutani, T., Tanaka, T., and Shimotohno, K. Hepatitis C virus population dynamics in human lymphocytes and hepatocytes infected in vitro. *J.Gen.Virol.*, 79 ( Pt 8): 1859-1869, 1998.
2. Zhang, J., Yamada, O., Ito, T., Akiyama, M., Hashimoto, Y., Yoshida, H., Makino, R., Masago, A., Uemura, H., and Araki, H. A single nucleotide insertion in the 5'-untranslated region of hepatitis C virus leads to enhanced cap-independent translation. *Virology*, 261: 263-270, 1999.
3. Otsuka, M., Kato, N., Lan, K., Yoshida, H., Kato, J., Goto, T., Shiratori, Y., and Omata, M. Hepatitis C virus core protein enhances p53 function through augmentation of DNA binding affinity and transcriptional ability. *J.Biol.Chem.*, 275: 34122-34130, 2000.
4. Takahashi, K., Iwata, K., Matsumoto, M., Matsumoto, H., Nakao, K., Hatahara, T., Ohta, Y., Kanai, K., Maruo, H., Baba, K., Hijikata, M., and Mishiro, S. Hepatitis C virus (HCV) genotype 1b sequences from fifteen patients with hepatocellular carcinoma: the 'progression score' revisited. *Hepatol.Res.*, 20: 161-171, 2001.
5. Alam, S. S., Nakamura, T., Naganuma, A., Nozaki, A., Nouso, K., Shimomura, H., and Kato, N. Hepatitis C virus quasispecies in cancerous

- and noncancerous hepatic lesions: the core protein-encoding region. *Acta Med. Okayama*, *56*: 141-147, 2002.
6. Ogata, S., Nagano-Fujii, M., Ku, Y., Yoon, S., and Hotta, H. Comparative sequence analysis of the core protein and its frameshift product, the F protein, of hepatitis C virus subtype 1b strains obtained from patients with and without hepatocellular carcinoma. *J. Clin. Microbiol.*, *40*: 3625-3630, 2002.
  7. Kishine, H., Sugiyama, K., Hijikata, M., Kato, N., Takahashi, H., Noshi, T., Nio, Y., Hosaka, M., Miyanari, Y., and Shimotohno, K. Subgenomic replicon derived from a cell line infected with the hepatitis C virus. *Biochem. Biophys. Res. Commun.*, *293*: 993-999, 2002.
  8. Yokota, T., Sakamoto, N., Enomoto, N., Tanabe, Y., Miyagishi, M., Maekawa, S., Yi, L., Kurosaki, M., Taira, K., Watanabe, M., and Mizusawa, H. Inhibition of intracellular hepatitis C virus replication by synthetic and vector-derived small interfering RNAs. *EMBO Rep.*, *4*: 602-608, 2003.
  9. Itakura, J., Nagayama, K., Enomoto, N., Hamano, K., Sakamoto, N., Fanning, L. J., Kenny-Walsh, E., Shanahan, F., and Watanabe, M. Viral load change and sequential evolution of entire hepatitis C virus genome in Irish recipients of single source-contaminated anti-D immunoglobulin\*. *J. Viral Hepat.*, *12*: 594-603, 2005.

10. Ikeda, M., Abe, K., Dansako, H., Nakamura, T., Naka, K., and Kato, N. Efficient replication of a full-length hepatitis C virus genome, strain O, in cell culture, and development of a luciferase reporter system. *Biochem.Biophys.Res.Commun.*, 329: 1350-1359, 2005.
11. Yanagi, M., Purcell, R. H., Emerson, S. U., and Bukh, J. Transcripts from a single full-length cDNA clone of hepatitis C virus are infectious when directly transfected into the liver of a chimpanzee. *Proc.Natl.Acad.Sci.U.S.A*, 94: 8738-8743, 1997.
12. Yanagi, M., St Claire, M., Shapiro, M., Emerson, S. U., Purcell, R. H., and Bukh, J. Transcripts of a chimeric cDNA clone of hepatitis C virus genotype 1b are infectious in vivo. *Virology*, 244: 161-172, 1998.
13. Hayashi, N., Higashi, H., Kaminaka, K., Sugimoto, H., Esumi, M., Komatsu, K., Hayashi, K., Sugitani, M., Suzuki, K., Tadao, O., and . Molecular cloning and heterogeneity of the human hepatitis C virus (HCV) genome. *J.Hepatol.*, 17 Suppl 3: S94-107, 1993.
14. Nagayama, K., Kurosaki, M., Enomoto, N., Maekawa, S. Y., Miyasaka, Y., Tazawa, J., Izumi, N., Marumo, F., and Sato, C. Time-related changes in full-length hepatitis C virus sequences and hepatitis activity. *Virology*, 263: 244-253, 1999.
15. Okamoto, H., Kojima, M., Okada, S., Yoshizawa, H., Iizuka, H., Tanaka, T., Muchmore, E. E., Peterson, D. A., Ito, Y., and Mishiro, S. Genetic drift

- of hepatitis C virus during an 8.2-year infection in a chimpanzee: variability and stability. *Virology*, 190: 894-899, 1992.
16. Sominskaya, I., Alekseeva, E., Skrastina, D., Mokhonov, V., Starodubova, E., Jansons, J., Levi, M., Prilipov, A., Kozlovska, T., Smirnov, V., Pumpens, P., and Isagulians, M. G. Signal sequences modulate the immunogenic performance of human hepatitis C virus E2 gene. *Mol.Immunol.*, 43: 1941-1952, 2006.
  17. Beard, M. R., Abell, G., Honda, M., Carroll, A., Gartland, M., Clarke, B., Suzuki, K., Lanford, R., Sangar, D. V., and Lemon, S. M. An infectious molecular clone of a Japanese genotype 1b hepatitis C virus. *Hepatology*, 30: 316-324, 1999.
  18. Nagayama, K., Kurosaki, M., Enomoto, N., Miyasaka, Y., Marumo, F., and Sato, C. Characteristics of hepatitis C viral genome associated with disease progression. *Hepatology*, 31: 745-750, 2000.
  19. Thomson, M., Nascimbeni, M., Gonzales, S., Murthy, K. K., Rehmann, B., and Liang, T. J. Emergence of a distinct pattern of viral mutations in chimpanzees infected with a homogeneous inoculum of hepatitis C virus. *Gastroenterology*, 121: 1226-1233, 2001.
  20. Lim, S. P., Khu, Y. L., Hong, W. J., Tay, A., Ting, A. E., Lim, S. G., and Tan, Y. H. Identification and molecular characterisation of the complete genome of a Singapore isolate of hepatitis C virus: sequence comparison

- with other strains and phylogenetic analysis. *Virus Genes*, 23: 89-95, 2001.
21. Yildiz, E., Oztan, A., Sar, F., Pinarbasi, E., Cetin-Atalay, R., Akkiz, H., and Ozturk, M. Molecular characterization of a full genome Turkish hepatitis C virus 1b isolate (HCV-TR1): a predominant viral form in Turkey. *Virus Genes*, 25: 169-177, 2002.
  22. Miller, K., McArdle, S., Gale, M. J., Jr., Geller, D. A., Tenover, B., Hiscott, J., Gretch, D. R., and Polyak, S. J. Effects of the hepatitis C virus core protein on innate cellular defense pathways. *J. Interferon Cytokine Res.*, 24: 391-402, 2004.
  23. Trowbridge, R. and Gowans, E. J. Molecular cloning of an Australian isolate of hepatitis C virus. *Arch. Virol.*, 143: 501-511, 1998.
  24. Rispeter, K., Lu, M., Behrens, S. E., Fumiko, C., Yoshida, T., and Roggendorf, M. Hepatitis C virus variability: sequence analysis of an isolate after 10 years of chronic infection. *Virus Genes*, 21: 179-188, 2000.
  25. Lohmann, V., Korner, F., Koch, J., Herian, U., Theilmann, L., and Bartenschlager, R. Replication of subgenomic hepatitis C virus RNAs in a hepatoma cell line. *Science*, 285: 110-113, 1999.
  26. Koch, J. O. and Bartenschlager, R. Modulation of hepatitis C virus NS5A hyperphosphorylation by nonstructural proteins NS3, NS4A, and NS4B. *J. Virol.*, 73: 7138-7146, 1999.

27. Tsukiyama-Kohara, K., Tone, S., Maruyama, I., Inoue, K., Katsume, A., Nuriya, H., Ohmori, H., Ohkawa, J., Taira, K., Hoshikawa, Y., Shibasaki, F., Reth, M., Minatogawa, Y., and Kohara, M. Activation of the CKI-CDK-Rb-E2F pathway in full genome hepatitis C virus-expressing cells. *J.Biol.Chem.*, 279: 14531-14541, 2004.
28. Kalinina, O., Norder, H., Mukomolov, S., and Magnius, L. O. A natural intergenotypic recombinant of hepatitis C virus identified in St. Petersburg. *J.Virol.*, 76: 4034-4043, 2002.
29. Youn, J. W., Park, S. H., Cho, J. H., and Sung, Y. C. Optimal induction of T-cell responses against hepatitis C virus E2 by antigen engineering in DNA immunization. *J.Virol.*, 77: 11596-11602, 2003.
30. Cocquerel, L., Wychowski, C., Minner, F., Penin, F., and Dubuisson, J. Charged residues in the transmembrane domains of hepatitis C virus glycoproteins play a major role in the processing, subcellular localization, and assembly of these envelope proteins. *J.Virol.*, 74: 3623-3633, 2000.
31. Fournillier-Jacob, A., Lunel, F., Cahour, A., Cresta, P., Frangeul, L., Perrin, M., Girard, M., and Wychowski, C. Antibody responses to hepatitis C envelope proteins in patients with acute or chronic hepatitis C. *J.Med.Virol.*, 50: 159-167, 1996.

32. Fukutomi, T., Zhou, Y., Kawai, S., Eguchi, H., Wands, J. R., and Li, J. Hepatitis C virus core protein stimulates hepatocyte growth: correlation with upregulation of wnt-1 expression. *Hepatology*, *41*: 1096-1105, 2005.
33. Qin, H., Shire, N. J., Keenan, E. D., Rouster, S. D., Eyster, M. E., Goedert, J. J., Koziel, M. J., and Sherman, K. E. HCV quasispecies evolution: association with progression to end-stage liver disease in hemophiliacs infected with HCV or HCV/HIV. *Blood*, *105*: 533-541, 2005.
34. Kubo, Y., Takeuchi, K., Boonmar, S., Katayama, T., Choo, Q. L., Kuo, G., Weiner, A. J., Bradley, D. W., Houghton, M., Saito, I., and . A cDNA fragment of hepatitis C virus isolated from an implicated donor of post-transfusion non-A, non-B hepatitis in Japan. *Nucleic Acids Res.*, *17*: 10367-10372, 1989.
35. Okamoto, H., Okada, S., Sugiyama, Y., Yotsumoto, S., Tanaka, T., Yoshizawa, H., Tsuda, F., Miyakawa, Y., and Mayumi, M. The 5'-terminal sequence of the hepatitis C virus genome. *Jpn.J.Exp.Med.*, *60*: 167-177, 1990.
36. Abe, K., Inchauspe, G., and Fujisawa, K. Genomic characterization and mutation rate of hepatitis C virus isolated from a patient who contracted hepatitis during an epidemic of non-A, non-B hepatitis in Japan. *J.Gen.Virol.*, *73 ( Pt 10)*: 2725-2729, 1992.



37. Wang, Y., Okamoto, H., Tsuda, F., Nagayama, R., Tao, Q. M., and Mishiro, S. Prevalence, genotypes, and an isolate (HC-C2) of hepatitis C virus in Chinese patients with liver disease. *J.Med.Virol.*, 40: 254-260, 1993.
38. Tanaka, T., Kato, N., Nakagawa, M., Ootsuyama, Y., Cho, M. J., Nakazawa, T., Hijikata, M., Ishimura, Y., and Shimotohno, K. Molecular cloning of hepatitis C virus genome from a single Japanese carrier: sequence variation within the same individual and among infected individuals. *Virus Res.*, 23: 39-53, 1992.
39. Esumi, M., Ahmed, M., Zhou, Y. H., Takahashi, H., and Shikata, T. Murine antibodies against E2 and hypervariable region 1 cross-reactively capture hepatitis C virus. *Virology*, 251: 158-164, 1998.
40. Nishihara, T., Nozaki, C., Nakatake, H., Hoshiko, K., Esumi, M., Hayashi, N., Hino, K., Hamada, F., Mizuno, K., and Shikata, T. Secretion and purification of hepatitis C virus NS1 glycoprotein produced by recombinant baculovirus-infected insect cells. *Gene*, 129: 207-214, 1993.
41. Seki, M. and Honda, Y. Phosphorothioate antisense oligodeoxynucleotides capable of inhibiting hepatitis C virus gene expression: in vitro translation assay. *J.Biochem.(Tokyo)*, 118: 1199-1204, 1995.

42. Seki, M., Honda, Y., Kondo, J., Fukuda, K., Ohta, K., Sugimoto, J., and Yamada, E. Effective production of the hepatitis C virus core antigen having high purity in *Escherichia coli*. *J.Biotechnol.*, *38*: 229-241, 1995.
43. Enomoto, N., Sakuma, I., Asahina, Y., Kurosaki, M., Murakami, T., Yamamoto, C., Izumi, N., Marumo, F., and Sato, C. Comparison of full-length sequences of interferon-sensitive and resistant hepatitis C virus 1b. Sensitivity to interferon is conferred by amino acid substitutions in the NS5A region. *J.Clin.Invest*, *96*: 224-230, 1995.
44. Kita, H., Moriyama, T., Kaneko, T., Harase, I., Nomura, M., Miura, H., Nakamura, I., Yazaki, Y., and Imawari, M. HLA B44-restricted cytotoxic T lymphocytes recognizing an epitope on hepatitis C virus nucleocapsid protein. *Hepatology*, *18*: 1039-1044, 1993.
45. Sugiyama, K., Kato, N., Mizutani, T., Ikeda, M., Tanaka, T., and Shimotohno, K. Genetic analysis of the hepatitis C virus (HCV) genome from HCV-infected human T cells. *J.Gen.Virol.*, *78 ( Pt 2)*: 329-336, 1997.
46. Aizaki, H., Aoki, Y., Harada, T., Ishii, K., Suzuki, T., Nagamori, S., Toda, G., Matsuura, Y., and Miyamura, T. Full-length complementary DNA of hepatitis C virus genome from an infectious blood sample. *Hepatology*, *27*: 621-627, 1998.
47. Kato, N., Hijikata, M., Ootsuyama, Y., Nakagawa, M., Ohkoshi, S., Sugimura, T., and Shimotohno, K. Molecular cloning of the human

- hepatitis C virus genome from Japanese patients with non-A, non-B hepatitis. *Proc.Natl.Acad.Sci.U.S.A*, 87: 9524-9528, 1990.
48. Cox, A. L., Mosbrugger, T., Mao, Q., Liu, Z., Wang, X. H., Yang, H. C., Sidney, J., Sette, A., Pardoll, D., Thomas, D. L., and Ray, S. C. Cellular immune selection with hepatitis C virus persistence in humans. *J.Exp.Med.*, 201: 1741-1752, 2005.
  49. Ray, S. C., Fanning, L., Wang, X. H., Netski, D. M., Kenny-Walsh, E., and Thomas, D. L. Divergent and convergent evolution after a common-source outbreak of hepatitis C virus. *J.Exp.Med.*, 201: 1753-1759, 2005.
  50. Kageyama, S., Agdamag, D. M., Alesna, E. T., Leano, P. S., Heredia, A. M., Abellanosa-Tac-An, I. P., Jereza, L. D., Tanimoto, T., Yamamura, J., and Ichimura, H. A natural inter-genotypic (2b/1b) recombinant of hepatitis C virus in the Philippines. *J.Med.Virol.*, 78: 1423-1428, 2006.
  51. Donlin, M. J., Cannon, N. A., Yao, E., Li, J., Wahed, A., Taylor, M. W., Belle, S. H., Di Bisceglie, A. M., Aurora, R., and Tavis, J. E. Pretreatment sequence diversity differences in the full-length hepatitis C virus open reading frame correlate with early response to therapy. *J.Virol.*, 81: 8211-8224, 2007.
  52. Noppornpanth, S., Smits, S. L., Lien, T. X., Poovorawan, Y., Osterhaus, A. D., and Haagmans, B. L. Characterization of Hepatitis C Virus Deletion Mutants Circulating in Chronically Infected Patients. *J.Virol.*, 2007.

53. Wang, X. H., Netski, D. M., Astemborski, J., Mehta, S. H., Torbenson, M. S., Thomas, D. L., and Ray, S. C. Progression of fibrosis during chronic hepatitis C is associated with rapid virus evolution. *J.Virol.*, 81: 6513-6522, 2007.
54. Li, J. S., Vitvitski, L., Tong, S. P., and Trepo, C. Identification of the third major genotype of hepatitis C virus in France. *Biochem.Biophys.Res.Commun.*, 199: 1474-1481, 1994.
55. Cho, S. H., Yoon, J. I., Chang, J. E., Ahn, B. M., Lee, C. H., and Lee, Y. I. Genomic typing of hepatitis C viruses from Korean patients: implications of genome variation in the E2/NS1 region. *Biochem.Biophys.Res.Commun.*, 196: 780-788, 1993.
56. Stuyver, L., Wyseur, A., van Arnhem, W., Lunel, F., Laurent-Puig, P., Pawlotsky, J. M., Kleter, B., Bassit, L., Nkengasong, J., van Doorn, L. J., and . Hepatitis C virus genotyping by means of 5'-UR/core line probe assays and molecular analysis of untypeable samples. *Virus Res.*, 38: 137-157, 1995.
57. Takamizawa, A., Mori, C., Fuke, I., Manabe, S., Murakami, S., Fujita, J., Onishi, E., Andoh, T., Yoshida, I., and Okayama, H. Structure and organization of the hepatitis C virus genome isolated from human carriers. *J.Virol.*, 65: 1105-1113, 1991.

58. Cha, T. A., Beall, E., Irvine, B., Kolberg, J., Chien, D., Kuo, G., and Urdea, M. S. At least five related, but distinct, hepatitis C viral genotypes exist. *Proc.Natl.Acad.Sci.U.S.A*, 89: 7144-7148, 1992.
59. Liu, K., Hu, Z., Li, H., Prince, A. M., and Inchauspe, G. Genomic typing of hepatitis C viruses present in China. *Gene*, 114: 245-250, 1992.
60. Chen, P. J., Lin, M. H., Tai, K. F., Liu, P. C., Lin, C. J., and Chen, D. S. The Taiwanese hepatitis C virus genome: sequence determination and mapping the 5' termini of viral genomic and antigenomic RNA. *Virology*, 188: 102-113, 1992.
61. Muller, H. M., Pfaff, E., Goeser, T., and Theilmann, L. Genetic variability of German hepatitis C virus isolates. *J.Med.Virol.*, 40: 291-306, 1993.
62. Yao, D. F., Horie, C., Horie, T., Shimizu, I., Meng, X. Y., and Ito, S. Virological features of hepatitis C virus infection in patients with liver diseases in the inshore area of the Yangtze River. *Tokushima J.Exp.Med.*, 41: 49-56, 1994.
63. Chou, W. H., Sheu, S. H., Sheu, L., Lu, C. F., Lin, S. Y., and Wu, J. S. Sequence analysis of nucleocapsid and partial envelope genes of the hepatitis C virus derived from an aboriginal asymptomatic carrier. *Zhonghua Min Guo.Wei Sheng Wu Ji.Mian.Yi.Xue.Za Zhi.*, 26: 57-67, 1993.

64. Kurosaki, M., Enomoto, N., Marumo, F., and Sato, C. Variations in the core region of hepatitis C virus genomes in patients with chronic hepatitis. *Arch.Virol.*, 140: 1087-1094, 1995.
65. Bukh, J., Purcell, R. H., and Miller, R. H. Sequence analysis of the core gene of 14 hepatitis C virus genotypes. *Proc.Natl.Acad.Sci.U.S.A*, 91: 8239-8243, 1994.
66. Songsivilai, S., Dharakul, T., Kunkitti, R., and Thepthai, C. Molecular cloning and expression of hepatitis C virus core protein and production of monoclonal antibodies to the recombinant protein. *Asian Pac.J.Allergy Immunol.*, 14: 31-41, 1996.
67. Jin, D. Y., Wang, H. L., Zhou, Y., Chun, A. C., Kibler, K. V., Hou, Y. D., Kung, H., and Jeang, K. T. Hepatitis C virus core protein-induced loss of LZIP function correlates with cellular transformation. *EMBO J.*, 19: 729-740, 2000.
68. Yeh, C. T., Lu, S. C., Chu, C. M., and Liaw, Y. F. Molecular cloning of a defective hepatitis C virus genome from the ascitic fluid of a patient with hepatocellular carcinoma. *J.Gen.Virol.*, 78 ( Pt 11): 2761-2770, 1997.
69. Honda, M., Kaneko, S., Unoura, M., Kobayashi, K., and Murakami, S. Sequence analysis of putative structural regions of hepatitis C virus isolated from 5 Japanese patients with hepatocellular carcinoma. *Arch.Virol.*, 128: 163-169, 1993.

70. Esumi, M., Rikihisa, T., Nishimura, S., Goto, J., Mizuno, K., Zhou, Y. H., and Shikata, T. Experimental vaccine activities of recombinant E1 and E2 glycoproteins and hypervariable region 1 peptides of hepatitis C virus in chimpanzees. *Arch.Virol.*, *144*: 973-980, 1999.
71. Yoshii, E., Shinzawa, H., Saito, T., Shao, L., Kuboki, M., Saito, K., Togashi, H., Takahashi, T., and Mizokami, M. Molecular epidemiology of hepatitis C virus infection in an area endemic for community-acquired acute hepatitis C. *Tohoku J.Exp.Med.*, *188*: 311-316, 1999.
72. Tokita, H., Kaufmann, G. R., Matsubayashi, M., Okuda, I., Tanaka, T., Harada, H., Mukaide, M., Suzuki, K., and Cooper, D. A. Hepatitis C virus core mutations reduce the sensitivity of a fluorescence enzyme immunoassay. *J.Clin.Microbiol.*, *38*: 3450-3452, 2000.
73. Tanaka, Y., Hanada, K., Hanabusa, H., Kurbanov, F., Gojobori, T., and Mizokami, M. Increasing genetic diversity of hepatitis C virus in haemophiliacs with human immunodeficiency virus coinfection. *J.Gen.Virol.*, *88*: 2513-2519, 2007.
74. Lwin, A. A., Shinji, T., Khin, M., Win, N., Obika, M., Okada, S., and Koide, N. Hepatitis C virus genotype distribution in Myanmar: Predominance of genotype 6 and existence of new genotype 6 subtype. *Hepatol.Res.*, *37*: 337-345, 2007.

75. Ray, S. C., Wang, Y. M., Laeyendecker, O., Ticehurst, J. R., Villano, S. A., and Thomas, D. L. Acute hepatitis C virus structural gene sequences as predictors of persistent viremia: hypervariable region 1 as a decoy. *J.Virol.*, 73: 2938-2946, 1999.
76. Lole, K. S., Jha, J. A., Shrotri, S. P., Tandon, B. N., Prasad, V. G., and Arankalle, V. A. Comparison of hepatitis C virus genotyping by 5' noncoding region- and core-based reverse transcriptase PCR assay with sequencing and use of the assay for determining subtype distribution in India. *J.Clin.Microbiol.*, 41: 5240-5244, 2003.
77. Zhang, S., Zhuang, H., Li, H., Widell, A., Qi, Z., and Zhang, H. Gene variation of 5'-NCR and core region in serum samples collected from patients with HCV infection. *Zhonghua Gan Zang.Bing.Za Zhi.*, 8: 144-146, 2000.
78. Zhang, W., Yu, H., Wang, X., Wang, Q., Lu, R., Wang, H. Q., and Shao, J. J. [Analysis of the nucleotide sequence for C and NS5 regions and the genotype of HCV isolate in Shandong Province]. *Zhonghua Shi Yan.He.Lin.Chuang.Bing.Du Xue.Za Zhi.*, 15: 219-221, 2001.
79. Ross, R. S., Viazov, S. O., Holtzer, C. D., Beyou, A., Monnet, A., Mazure, C., and Roggendorf, M. Genotyping of hepatitis C virus isolates using CLIP sequencing. *J.Clin.Microbiol.*, 38: 3581-3584, 2000.



80. Ray, S. C., Arthur, R. R., Carella, A., Bukh, J., and Thomas, D. L. Genetic epidemiology of hepatitis C virus throughout egypt. *J.Infect.Dis.*, 182: 698-707, 2000.
81. Ross, R. S., Viazov, S., Thormahlen, M., Bartz, L., Tamm, J., Rautenberg, P., Roggendorf, M., and Deister, A. Risk of hepatitis C virus transmission from an infected gynecologist to patients: results of a 7-year retrospective investigation. *Arch.Intern.Med.*, 162: 805-810, 2002.
82. Gimenez-Barcons, M., Franco, S., Suarez, Y., Forns, X., Ampurdanes, S., Puig-Basagoiti, F., Sanchez-Fueyo, A., Barrera, J. M., Llovet, J. M., Bruix, J., Sanchez-Tapias, J. M., Rodes, J., and Saiz, J. C. High amino acid variability within the NS5A of hepatitis C virus (HCV) is associated with hepatocellular carcinoma in patients with HCV-1b-related cirrhosis. *Hepatology*, 34: 158-167, 2001.
83. Theamboonlers, A., Chinchai, T., Bedi, K., Jantarasamee, P., Sripontong, M., and Poovorawan, Y. Molecular characterization of Hepatitis C virus (HCV) core region in HCV-infected Thai blood donors. *Acta Virol.*, 46: 169-173, 2002.
84. Shustov, A. V., Kochneva, G. V., Sivolobova, G. F., Grazhdantseva, A. A., Gavrilova, I. V., Akinfeeva, L. A., Rakova, I. G., Aleshina, M. V., Bukin, V. N., Orlovsky, V. G., Besspalov, V. S., Robertson, B. H., and Netesov, S. V. Molecular epidemiology of the hepatitis C virus in Western Siberia. *J.Med.Virol.*, 77: 382-389, 2005.

85. Colina, R., Casane, D., Vasquez, S., Garcia-Aguirre, L., Chunga, A., Romero, H., Khan, B., and Cristina, J. Evidence of intratypic recombination in natural populations of hepatitis C virus. *J.Gen.Virol.*, 85: 31-37, 2004.
86. Cristina, J., Lopez, F., Moratorio, G., Lopez, L., Vasquez, S., Garcia-Aguirre, L., and Chunga, A. Hepatitis C virus F protein sequence reveals a lack of functional constraints and a variable pattern of amino acid substitution. *J.Gen.Virol.*, 86: 115-120, 2005.
87. Lavillette, D., Morice, Y., Germanidis, G., Donot, P., Soulier, A., Pagkalos, E., Sakellariou, G., Intrator, L., Bartosch, B., Pawlotsky, J. M., and Cosset, F. L. Human serum facilitates hepatitis C virus infection, and neutralizing responses inversely correlate with viral replication kinetics at the acute phase of hepatitis C virus infection. *J.Virol.*, 79: 6023-6034, 2005.
88. Dumpis, U., Kovalova, Z., Jansons, J., Cupane, L., Sominskaya, I., Michailova, M., Karayiannis, P., Gardovska, D., Viazov, S., Ross, S., Roggendorf, M., and Pumpens, P. An outbreak of HBV and HCV infection in a paediatric oncology ward: epidemiological investigations and prevention of further spread. *J.Med.Virol.*, 69: 331-338, 2003.
89. Ndjomou, J., Pybus, O. G., and Matz, B. Phylogenetic analysis of hepatitis C virus isolates indicates a unique pattern of endemic infection in Cameroon. *J.Gen.Virol.*, 84: 2333-2341, 2003.

90. Bhattacharyya, S., Mapa, K., Prabhavathi, S., Sudhamani, S. R., Menon, P. K., John, K. P., Shivaram, C., Amarnath, S., and Das, S. Phylogenetic conservation of the stem-loop III structure of the 5' untranslated region of Hepatitis C virus RNA among natural variants in samples collected from Southern India. *Arch.Virol.*, 149: 1015-1026, 2004.
91. Blackard, J. T., Yang, Y., Bordoni, P., Sherman, K. E., and Chung, R. T. Hepatitis C virus (HCV) diversity in HIV-HCV-coinfected subjects initiating highly active antiretroviral therapy. *J.Infect.Dis.*, 189: 1472-1481, 2004.
92. Re, V., Lampe, E., Yoshida, C. F., de Oliveira, J. M., Lewis-Ximenez, L., Spinsanti, L., Elbarcha, O., and Contigiani, M. Hepatitis C virus genotypes in Cordoba, Argentina. Unexpected high prevalence of genotype 2. *Medicina (B Aires)*, 63: 205-210, 2003.
93. Abdel-Hamid, M., El Daly, M., Molnegren, V., El Kafrawy, S., Abdel-Latif, S., Esmat, G., Strickland, G. T., Loffredo, C., Albert, J., and Widell, A. Genetic diversity in hepatitis C virus in Egypt and possible association with hepatocellular carcinoma. *J.Gen.Virol.*, 88: 1526-1531, 2007.
94. Piron, M., Beguiristain, N., Nadal, A., Martinez-Salas, E., and Gomez, J. Characterizing the function and structural organization of the 5' tRNA-like motif within the hepatitis C virus quasispecies. *Nucleic Acids Res.*, 33: 1487-1502, 2005.

95. Deforges, S., Evlashev, A., Perret, M., Sodoyer, M., Pouzol, S., Scoazec, J. Y., Bonnaud, B., Diaz, O., Paranhos-Baccala, G., Lotteau, V., and Andre, P. Expression of hepatitis C virus proteins in epithelial intestinal cells in vivo. *J.Gen.Virol.*, 85: 2515-2523, 2004.
96. Thaikruea, L., Thongsawat, S., Maneeakarn, N., Netski, D., Thomas, D. L., and Nelson, K. E. Risk factors for hepatitis C virus infection among blood donors in northern Thailand. *Transfusion*, 44: 1433-1440, 2004.
97. Poon, A. F., Kosakovsky Pond, S. L., Bennett, P., Richman, D. D., Leigh Brown, A. J., and Frost, S. D. Adaptation to human populations is revealed by within-host polymorphisms in HIV-1 and hepatitis C virus. *PLoS.Pathog.*, 3: e45, 2007.
98. Lu, L., Nakano, T., He, Y., Fu, Y., Hagedorn, C. H., and Robertson, B. H. Hepatitis C virus genotype distribution in China: predominance of closely related subtype 1b isolates and existence of new genotype 6 variants. *J.Med.Virol.*, 75: 538-549, 2005.
99. Garten, R. J., Zhang, J., Lai, S., Liu, W., Chen, J., and Yu, X. F. Coinfection with HIV and hepatitis C virus among injection drug users in southern China. *Clin.Infect.Dis.*, 41 *Suppl 1*: S18-S24, 2005.
100. Lopez-Labrador, F. X., Bracho, M. A., Berenguer, M., Coscolla, M., Rayon, J. M., Prieto, M., Carrasco, D., Gomez, M. D., Moya, A., and Gonzalez-Candelas, F. Genetic similarity of hepatitis C virus and fibrosis

- progression in chronic and recurrent infection after liver transplantation. *J.Viral Hepat.*, 13: 104-115, 2006.
101. Broor, S., Bhupatiraju, A. V., Broor, S. L., Ghosh, D., Anand, R., Rai, A., Colina, R., Garcia, L., Khan, B., and Cristina, J. Analysis of genetic variability of Indian isolates of Hepatitis C virus. *Arch.Virol.*, 149: 1185-1192, 2004.
  102. Hijikata, M., Kato, N., Ootsuyama, Y., Nakagawa, M., Ohkoshi, S., and Shimotohno, K. Hypervariable regions in the putative glycoprotein of hepatitis C virus. *Biochem.Biophys.Res.Comm.*, 175: 220-228, 1991.
  103. Hotta, H., Doi, H., Hayashi, T., Purwanta, M., Soemarto, W., Mizokami, M., Ohba, K., and Homma, M. Analysis of the core and E1 envelope region sequences of a novel variant of hepatitis C virus obtained in Indonesia. *Arch.Virol.*, 136: 53-62, 1994.
  104. Tsukiyama-Kohara, K., Yamaguchi, K., Maki, N., Ohta, Y., Miki, K., Mizokami, M., Ohba, K., Tanaka, S., Hattori, N., Nomoto, A., and . Antigenicities of Group I and II hepatitis C virus polypeptides--molecular basis of diagnosis. *Virology*, 192: 430-437, 1993.
  105. Chayama, K., Kobayashi, M., Tsubota, A., Koida, I., Arase, Y., Saitoh, S., Ikeda, K., and Kumada, H. Molecular analysis of intraspousal transmission of hepatitis C virus. *J.Hepatol.*, 22: 431-439, 1995.

106. Kato, N., Ootsuyama, Y., Sekiya, H., Ohkoshi, S., Nakazawa, T., Hijikata, M., and Shimotohno, K. Genetic drift in hypervariable region 1 of the viral genome in persistent hepatitis C virus infection. *J.Virol.*, 68: 4776-4784, 1994.
107. Ohno, O., Mizokami, M., Wu, R. R., Saleh, M. G., Ohba, K., Orito, E., Mukaide, M., Williams, R., and Lau, J. Y. New hepatitis C virus (HCV) genotyping system that allows for identification of HCV genotypes 1a, 1b, 2a, 2b, 3a, 3b, 4, 5a, and 6a. *J.Clin.Microbiol.*, 35: 201-207, 1997.
108. Amini, S., Ahmadi Pour, M. H., and Azadmanesh, K. The phylogenetic analysis of hepatitis C virus isolates obtained from two Iranian carriers revealed evidence for a new subtype of HCV genotype 3. *Virus Genes*, 33: 271-278, 2006.
109. Noppornpanth, S., Lien, T. X., Poovorawan, Y., Smits, S. L., Osterhaus, A. D., and Haagmans, B. L. Identification of a naturally occurring recombinant genotype 2/6 hepatitis C virus. *J.Virol.*, 80: 7569-7577, 2006.
110. Espirito-Santo, M. P., Carneiro, M. A., Reis, N. R., Kozlowski, A. G., Teles, S. A., Lampe, E., Yoshida, C. F., and Martins, R. M. Genotyping hepatitis C virus from hemodialysis patients in Central Brazil by line probe assay and sequence analysis. *Braz.J.Med.Biol.Res.*, 40: 545-550, 2007.
111. Nainan, O. V., Lu, L., Gao, F. X., Meeks, E., Robertson, B. H., and Margolis, H. S. Selective transmission of hepatitis C virus genotypes and

- quasispecies in humans and experimentally infected chimpanzees.  
*J.Gen.Virol.*, 87: 83-91, 2006.
112. Moreau, I., Hegarty, S., Levis, J., Sheehy, P., Crosbie, O., Kenny-Walsh, E., and Fanning, L. J. Serendipitous identification of natural intergenotypic recombinants of hepatitis C in Ireland. *Virol.J.*, 3: 95, 2006.
113. Kumar, D., Malik, A., Asim, M., Chakravarti, A., Das, R. H., and Kar, P. Response of Combination Therapy on Viral Load and Disease Severity in Chronic Hepatitis C. *Dig.Dis.Sci.*, 2007.
114. Noppornpanth, S., Sablon, E., De Nys, K., Truong, X. L., Brouwer, J., Van Brussel, M., Smits, S. L., Poovorawan, Y., Osterhaus, A. D., and Haagmans, B. L. Genotyping hepatitis C viruses from Southeast Asia by a novel line probe assay that simultaneously detects core and 5' untranslated regions. *J.Clin.Microbiol.*, 44: 3969-3974, 2006.
115. Castillo, I., Rodriguez-Inigo, E., Lopez-Alcorocho, J. M., Pardo, M., Bartolome, J., and Carreno, V. Hepatitis C virus replicates in the liver of patients who have a sustained response to antiviral treatment. *Clin.Infect.Dis.*, 43: 1277-1283, 2006.
116. Kageyama, S., Agdamag, D. M., Alesna, E. T., Leano, P. S., Heredia, A. M., Abellanosa-Tac-An, I. P., Jereza, L. D., Tanimoto, T., Yamamura, J., and Ichimura, H. A natural inter-genotypic (2b/1b) recombinant of hepatitis C virus in the Philippines. *J.Med.Virol.*, 78: 1423-1428, 2006.

117. Wylie, J. L., Shah, L., and Jolly, A. M. Demographic, risk behaviour and personal network variables associated with prevalent hepatitis C, hepatitis B, and HIV infection in injection drug users in Winnipeg, Canada. *BMC.Public Health*, 6: 229, 2006.
118. Bartolome, J., Lopez-Alcorocho, J. M., Castillo, I., Rodriguez-Inigo, E., Quiroga, J. A., Palacios, R., and Carreno, V. Ultracentrifugation of serum samples allows detection of hepatitis C virus RNA in patients with occult hepatitis C. *J.Virol.*, 81: 7710-7715, 2007.
119. Murphy, D. G., Willems, B., Deschenes, M., Hilzenrat, N., Mousseau, R., and Sabbah, S. Use of sequence analysis of the NS5B region for routine genotyping of hepatitis C virus with reference to C/E1 and 5' untranslated region sequences. *J.Clin.Microbiol.*, 45: 1102-1112, 2007.
120. Ross, R. S., Viazov, S., and Roggendorf, M. Genotyping of hepatitis C virus isolates by a new line probe assay using sequence information from both the 5'untranslated and the core regions. *J.Virol.Methods*, 143: 153-160, 2007.
121. van Doorn, L. J., Kleter, B., Stuyver, L., Maertens, G., Brouwer, H., Schalm, S., Heijtkink, R., and Quint, W. Analysis of hepatitis C virus genotypes by a line probe assay and correlation with antibody profiles. *J.Hepatol.*, 21: 122-129, 1994.



122. Simmonds, P., Mellor, J., Sakuldamrongpanich, T., Nuchaprayoon, C., Tanprasert, S., Holmes, E. C., and Smith, D. B. Evolutionary analysis of variants of hepatitis C virus found in South-East Asia: comparison with classifications based upon sequence similarity. *J.Gen.Virol.*, *77 ( Pt 12)*: 3013-3024, 1996.
123. Bukh, J., Purcell, R. H., and Miller, R. H. Sequence analysis of the 5' noncoding region of hepatitis C virus. *Proc.Natl.Acad.Sci.U.S.A*, *89*: 4942-4946, 1992.
124. Kohara, M., Tsukiyama-Kohara, K., Maki, N., Asano, K., Yamaguchi, K., Miki, K., Tanaka, S., Hattori, N., Matsuura, Y., Saito, I., and . Expression and characterization of glycoprotein gp35 of hepatitis C virus using recombinant vaccinia virus. *J.Gen.Virol.*, *73 ( Pt 9)*: 2313-2318, 1992.
125. Geiger, C. P. and Caselmann, W. H. Non-radioactive hybridization with hepatitis C virus-specific probes created during polymerase chain reaction: a fast and simple procedure to verify hepatitis C virus infection. *J.Hepatol.*, *15*: 387-390, 1992.
126. Honda, M., Kaneko, S., Unoura, M., Kobayashi, K., and Murakami, S. Risk of hepatitis C virus infections through household contact with chronic carriers: analysis of nucleotide sequences. *Hepatology*, *17*: 971-976, 1993.

127. Kao, J. H., Chen, P. J., Lai, M. Y., and Chen, D. S. Superinfection of heterologous hepatitis C virus in a patient with chronic type C hepatitis. *Gastroenterology*, 105: 583-587, 1993.
128. Tan, D. M., Hu, G. L., Arima, T., Zhang, Z., Nanba, T., and Hatanaka, T. Molecular cloning, sequencing and expression of core and NS3 fragments of HCV from patients with HCV infection. *Chin Med.J.(Engl.)*, 106: 522-526, 1993.
129. Hada, H., Koide, N., Takabatake, H., Hanafusa, T., and Tsuji, T. Sequence variations in the envelope protein of the hepatitis C virus: comparison with partial cDNA sequence of a new variant virus obtained by the polymerase chain reaction. *Acta Med.Okayama*, 45: 347-355, 1991.
130. Hitomi, Y., McDonnell, W. M., Baker, J. R., Jr., and Askari, F. K. High efficiency prokaryotic expression and purification of a portion of the hepatitis C core protein and analysis of the immune response to recombinant protein in BALB/c mice. *Viral Immunol.*, 8: 109-119, 1995.
131. Kanistanon, D., Neelamek, M., Dharakul, T., and Songsivilai, S. Genotypic distribution of hepatitis C virus in different regions of Thailand. *J.Clin.Microbiol.*, 35: 1772-1776, 1997.
132. Yun, Z., Lara, C., Johansson, B., Lorenzana, d. R., I, and Sonnerborg, A. Discrepancy of hepatitis C virus genotypes as determined by phylogenetic

- analysis of partial NS5 and core sequences. *J.Med.Virol.*, 49: 155-160, 1996.
133. Mellor, J., Holmes, E. C., Jarvis, L. M., Yap, P. L., and Simmonds, P. Investigation of the pattern of hepatitis C virus sequence diversity in different geographical regions: implications for virus classification. The International HCV Collaborative Study Group. *J.Gen.Virol.*, 76 ( Pt 10): 2493-2507, 1995.
134. Vizmanos, J. L., Gonzalez-Navarro, C. J., Novo, F. J., Civeira, M. P., Prieto, J., Gullon, A., and Garcia-Delgado, M. Degree and distribution of variability in the 5' untranslated, E1, E2/NS1 and NS5 regions of the hepatitis C virus (HCV). *J.Viral Hepat.*, 5: 227-240, 1998.
135. Lerat, H., Rumin, S., Habersetzer, F., Berby, F., Trabaud, M. A., Trepo, C., and Inchauspe, G. In vivo tropism of hepatitis C virus genomic sequences in hematopoietic cells: influence of viral load, viral genotype, and cell phenotype. *Blood*, 91: 3841-3849, 1998.
136. Qu, D., Hantz, O., Gouy, M., Vitvitski, L., Li, J. S., Berby, F., Tong, S. P., and Trepo, C. Heterogeneity of hepatitis C virus genotypes in France. *J.Gen.Virol.*, 75 ( Pt 5): 1063-1070, 1994.
137. Feucht, H. H., Zollner, B., Polywka, S., and Laufs, R. Study on reliability of commercially available hepatitis C virus antibody tests. *J.Clin.Microbiol.*, 33: 620-624, 1995.

138. Panigrahi, A. K., Roca, J., Acharya, S. K., Jameel, S., and Panda, S. K. Genotype determination of hepatitis C virus from northern India: identification of a new subtype. *J.Med.Virol.*, *48*: 191-198, 1996.
139. van Doorn, L. J., Kleter, G. E., Stuyver, L., Maertens, G., Brouwer, J. T., Schalm, S. W., Heijtkink, R. A., and Quint, W. G. Sequence analysis of hepatitis C virus genotypes 1 to 5 reveals multiple novel subtypes in the Benelux countries. *J.Gen.Virol.*, *76 ( Pt 7)*: 1871-1876, 1995.
